# Supplementary material
Source: publisher figshare collection journal article supplement (https://gsapubs.figshare.com/ndownloader/files/27578816)
Supplement: Supplementary file 1 [file 27578816]

## Sheet: Raw data
Supplemental file B: Point-counting raw data and recalculated parameters for sandstones of the Cualac formation and lower Tecocoyunca group											Zepeda-Martínez, M., Martini, M., Solari, L., and Mendoza-Rosales, C.C., 2021, Reconstructing the tectono-sedimentary evolution of the Early–Middle Jurassic Tlaxiaco Basin in southern Mexico: New insights into the crustal attenuation history of southern North America during Pangea breakup: Geosphere, v. 17, https://doi.org/10.1130/GES02309.1
Point-counting proportions
Tlaxiaco area
Sample	Unit	Qs	QRm	QLvf	Qp	Ks	KLvf	Ps	PLvf	Lmf2	Lmf3	Lmp2	Lmp3	Lmp4	Lvf	H	Und	TOT
ÑU-0318-1	Cualac formation	11	278	0	0	0	0	0	0	20	33	15	49	18	0	2	0	426
MI-0318-2	Cualac formation	10	253	0	0	0	0	0	0	9	33	12	97	4	0	2	0	420
MI-0318-3	Cualac formation	3	294	0	0	0	0	0	0	5	24	7	73	16	0	1	0	423
ÑU-0318-2	Cualac formation	29	97	0	0	0	0	0	0	3	6	2	65	197	0	1	0	400
TB-0817-1	Lower Tecocoyunca group	102	223	15	1	0	0	0	0	2	0	6	3	0	63	0	0	415
TB-0817-2	Lower Tecocoyunca group	119	218	26	0	0	0	0	0	12	0	35	12	4	66	1	0	493
TB-0817-3	Lower Tecocoyunca group	48	202	20	0	0	0	0	0	31	4	58	7	2	51	1	0	424
Tla-13	Lower Tecocoyunca group	190	205	0	1	0	0	0	0	0	0	1	0	1	10	2	1	411
TB-04	Lower Tecocoyunca group	246	100	2	0	3	0	0	0	7	1	7	0	0	32	3	4	405
TLA-64	Lower Tecocoyunca group	33	337	1	0	0	0	5	0	0	0	2	4	0	6	6	5	399
TLA-69	Lower Tecocoyunca group	154	223	7	0	0	0	0	0	0	0	0	0	0	15	1	0	400
TLA-0318-2	Lower Tecocoyunca group	184	170	5	0	2	0	2	0	4	0	4	0	0	25	6	3	405
Tezoatlán area
Sample	Unit	Qs	QRm	QLvf	Qp	Ks	KLvf	Ps	PLvf	Lmf2	Lmf3	Lmp2	Lmp3	Lmp4	Lvf	H	Und	TOT
9RC	Cualac formation	14	279	0	0	0	0	0	0	2	26	16	51	13	0	0	0	401
10RC	Cualac formation	10	228	0	2	0	0	0	0	1	50	20	75	20	0	0	0	406
13C	Cualac formation	11	140	0	0	0	0	0	0	73	40	61	73	15	0	0	0	413
15C	Cualac formation	5	255	0	0	0	0	0	0	0	37	0	57	17	0	0	0	371
16C	Cualac formation	8	179	0	1	0	0	0	0	40	39	49	93	8	0	0	0	417
18C	Cualac formation	7	301	0	0	0	0	0	0	0	9	0	79	20	0	0	0	416
19C	Cualac formation	7	168	0	0	0	0	0	0	40	15	26	124	24	0	0	0	404
20C	Cualac formation	1	288	0	0	0	0	0	0	26	16	11	57	15	0	0	0	414
22C	Cualac formation	2	246	0	0	0	0	0	0	22	30	13	119	14	0	0	0	446
24C	Cualac formation	0	355	0	0	0	0	0	0	0	9	0	25	22	0	0	0	411
TEC-9-16-1	Lower Tecocoyunca group	106	202	15	2	0	0	0	0	7	2	4	3	0	61	2	0	404
TEC-9-16-2	Lower Tecocoyunca group	98	192	40	4	0	0	0	0	11	0	10	25	3	82	3	0	468
TEC-9-16-3	Lower Tecocoyunca group	165	128	23	2	0	0	0	0	1	2	6	11	2	73	2	0	415
TEC-9-16-4	Lower Tecocoyunca group	180	204	3	0	0	0	0	0	0	0	3	0	2	8	0	0	400
Tecomatlán area
Sample	Unit	Qs	QRm	QLvf	Qp	Ks	KLvf	Ps	PLvf	Lmf2	Lmf3	Lmp2	Lmp3	Lmp4	Lvf	H	Und	TOT
MIX-4	Cualac formation	12	364	1	1	0	0	0	0	19	1	6	4	1	1	0	0	410
MIX-5	Cualac formation	235	116	3	3	0	0	0	0	9	0	12	17	11	4	0	0	410
MIX-7	Cualac formation	52	287	2	0	0	0	0	0	30	3	9	17	1	2	0	0	403
Tmt-0219-1	Cualac formation	23	281	0	0	0	0	0	0	39	14	13	24	18	0	3	0	415
Tmt-0219-8	Cualac formation	30	242	0	0	0	0	0	0	43	6	26	49	13	0	1	0	410
Tmt-0219-9	Cualac formation	13	281	0	0	0	0	0	0	34	36	2	9	24	1	0	0	400
Tmt-0219-14	Cualac formation	33	339	0	1	0	0	0	0	19	5	9	5	2	0	1	0	414
Tmt-0219-16	Cualac formation	23	185	0	0	0	0	0	0	26	18	14	90	57	0	2	0	415
MIX-1	Lower Tecocoyunca group	171	198	1	0	0	0	0	0	17	1	6	0	0	5	0	1	400
MIX-2	Lower Tecocoyunca group	149	199	4	2	0	0	0	1	16	0	14	5	2	18	0	0	410
MIX-3	Lower Tecocoyunca group	134	246	1	2	0	0	0	0	6	2	6	0	0	12	0	1	410
MIX-6	Lower Tecocoyunca group	257	110	1	0	0	0	0	0	5	0	18	9	6	1	2	1	410
Tmt-0219-7	Lower Tecocoyunca group	279	60	8	0	0	0	0	0	5	1	21	3	1	17	3	2	400
Tmt-0219-10	Lower Tecocoyunca group	159	207	6	1	0	0	0	0	11	1	5	0	0	8	2	0	400
Tmt-0219-11	Lower Tecocoyunca group	121	256	0	0	0	0	0	0	6	0	5	1	1	14	3	3	410
Tmt-0219-12	Lower Tecocoyunca group	112	267	0	0	0	0	0	0	6	3	6	0	1	3	2	0	400
Tmt-0219-13	Lower Tecocoyunca group	268	71	16	0	0	0	0	0	9	1	11	4	0	17	1	2	400
Tmt-0219-17	Lower Tecocoyunca group	123	258	0	0	0	0	0	0	0	3	5	0	0	11	0	0	400
Olinalá area
Sample	Unit	Qs	QRm	QLvf	Qp	Ks	KLvf	Ps	PLvf	Lmf2	Lmf3	Lmp2	Lmp3	Lmp4	Lvf	H	Und	TOT
CU-02	Cualac formation	22	365	0	0	0	0	0	0	14	1	6	14	2	0	0	0	424
CU-03	Cualac formation	12	374	0	0	0	0	0	0	19	2	5	3	1	0	0	0	416
CU-05	Cualac formation	37	341	0	1	0	0	0	0	19	2	8	15	2	0	2	0	427
CU-06	Cualac formation	34	368	0	3	0	0	0	0	17	1	2	4	1	0	1	0	431
CU-08	Cualac formation	54	351	0	1	0	0	0	0	4	0	1	3	0	0	0	0	414
CT-10	Cualac formation	60	352	0	2	0	0	0	0	3	2	4	4	0	0	0	0	427
CT-11	Cualac formation	38	349	0	0	0	0	0	0	11	3	8	6	1	0	1	0	417
T-12	Lower Tecocoyunca group	61	337	1	1	0	0	0	0	8	0	4	7	0	4	2	0	425
T-13	Lower Tecocoyunca group	82	264	8	3	0	0	0	0	7	0	8	1	0	45	0	0	418
OL-0618-T3	Lower Tecocoyunca group	141	208	4	0	10	0	17	0	1	0	1	0	0	11	7	0	400
OL-1018-1b	Lower Tecocoyunca group	246	54	16	0	6	1	9	1	6	1	9	0	0	39	6	6	400
OL-1018-2	Lower Tecocoyunca group	329	33	1	0	8	0	10	1	1	0	0	0	0	9	4	4	400
OL-1018-3a	Lower Tecocoyunca group	200	171	3	0	3	0	4	0	0	0	2	0	0	7	6	2	398
OL-1018-4	Lower Tecocoyunca group	201	149	6	0	1	1	6	0	2	0	5	1	0	15	7	6	400

## Sheet: Recalculated parameters
Supplemental file B: Recalculated parameters
Tlaxiaco area
Sample	Unit	QtFL%Qt	QtFL%F	QtFL%L	LmLvLs%Lm	LmLvLs%Lv	LmLvLs%Ls	LmfLmpLvf%Lmf	LmfLmpLvf%Lmp	LmfLmpLvf%Lvf	R1R2-3R4%R1	R1R2-3R4%R2-3	R1R2-3R4%R4
ÑU-0318-1	Cualac formation	68.1604	0	31.8396	100	0	0	39.2593	60.7407	0	0	86.6667	13.3333
MI-0318-2	Cualac formation	62.9187	0	37.0813	100	0	0	27.0968	72.9032	0	0	97.4194	2.58065
MI-0318-3	Cualac formation	70.3791	0	29.6209	100	0	0	23.2	76.8	0	0	87.2	12.8
ÑU-0318-2	Cualac formation	31.5789	0	68.4211	100	0	0	3.2967	96.7033	0	0	27.8388	72.1612
TB-0817-1	Lower Tecocoyunca group	82.1687	0	17.8313	14.8649	85.1351	0	2.7027	12.1622	85.1351	0	100	0
TB-0817-2	Lower Tecocoyunca group	73.7805	0	26.2195	48.8372	51.1628	0	9.30233	39.5349	51.1628	0	93.6508	6.34921
TB-0817-3	Lower Tecocoyunca group	63.8298	0	36.1702	66.6667	33.3333	0	22.8758	43.7908	33.3333	0	98.0392	1.96078
Tla-13	Lower Tecocoyunca group	97.0588	0	2.94118	16.6667	83.3333	0	0	16.6667	83.3333	0	50	50
TB-04	Lower Tecocoyunca group	87.4372	0.753769	11.809	31.9149	68.0851	0	17.0213	14.8936	68.0851	0	100	0
TLA-64	Lower Tecocoyunca group	95.6186	1.28866	3.09278	50	50	0	0	50	50	0	100	0
TLA-69	Lower Tecocoyunca group	96.2406	0	3.7594	0	100	0	0	0	100	0	0	0
TLA-0318-2	Lower Tecocoyunca group	90.6566	1.0101	8.33333	24.2424	75.7576	0	12.1212	12.1212	75.7576	0	100	0
Tezoatlán area
Sample	Unit	QtFL%Q	QtFL%F	QtFL%L	LmLvLs%Lm	LmLvLs%Lv	LmLvLs%Ls	LmfLmpLvf%Lmf	LmfLmpLvf%Lmp	LmfLmpLvf%Lvf	R1R2-3R4%R1	R1R2-3R4%R2-3	R1R2-3R4%R4
9RC	Cualac formation	73.0673	0	26.9327	100	0	0	25.9259	74.0741	0	0	87.963	12.037
10RC	Cualac formation	59.1133	0	40.8867	100	0	0	30.7229	69.2771	0	0	87.9518	12.0482
13C	Cualac formation	36.5617	0	63.4383	100	0	0	43.1298	56.8702	0	0	94.2748	5.72519
15C	Cualac formation	70.0809	0	29.9191	100	0	0	33.3333	66.6667	0	0	84.6847	15.3153
16C	Cualac formation	45.0839	0	54.9161	100	0	0	34.4978	65.5022	0	0	96.5066	3.49345
18C	Cualac formation	74.0385	0	25.9615	100	0	0	8.33333	91.6667	0	0	81.4815	18.5185
19C	Cualac formation	43.3168	0	56.6832	100	0	0	24.0175	75.9825	0	0	89.5197	10.4803
20C	Cualac formation	69.8068	0	30.1932	100	0	0	33.6	66.4	0	0	88	12
22C	Cualac formation	55.6054	0	44.3946	100	0	0	26.2626	73.7374	0	0	92.9293	7.07071
24C	Cualac formation	86.3747	0	13.6253	100	0	0	16.0714	83.9286	0	0	60.7143	39.2857
TEC-9-16-1	Lower Tecocoyunca group	80.8458	0	19.1542	20.7792	79.2208	0	50.7246	5.07246	44.2029	0	100	0
TEC-9-16-2	Lower Tecocoyunca group	71.828	0	28.172	37.4046	62.5954	0	43.662	17.8404	38.4977	0	93.8776	6.12245
TEC-9-16-3	Lower Tecocoyunca group	76.9976	0	23.0024	23.1579	76.8421	0	45.2381	11.3095	43.4524	0	90.9091	9.09091
TEC-9-16-4	Lower Tecocoyunca group	96.75	0	3.25	38.4615	61.5385	0	38.0952	23.8095	38.0952	0	60	40
Tecomatlán area
Sample	Unit	QtFL%Q	QtFL%F	QtFL%L	LmLvLs%Lm	LmLvLs%Lv	LmLvLs%Ls	LmfLmpLvf%Lmf	LmfLmpLvf%Lmp	LmfLmpLvf%Lvf	R1R2-3R4%R1	R1R2-3R4%R2-3	R1R2-3R4%R4
MIX-4	Cualac formation	92.1951	0	7.80488	96.875	3.125	0	62.5	34.375	3.125	0	96.7742	3.22581
MIX-5	Cualac formation	87.0732	0	12.9268	92.4528	7.54717	0	16.9811	75.4717	7.54717	0	77.551	22.449
MIX-7	Cualac formation	84.6154	0	15.3846	96.7742	3.22581	0	53.2258	43.5484	3.22581	0	98.3333	1.66667
Tmt-0219-1	Cualac formation	73.7864	0	26.2136	100	0	0	49.0741	50.9259	0	0	83.3333	16.6667
Tmt-0219-8	Cualac formation	66.5037	0	33.4963	100	0	0	35.7664	64.2336	0	0	90.5109	9.48905
Tmt-0219-9	Cualac formation	73.5	0	26.5	99.0566	0.943396	0	66.0377	33.0189	0.943396	0	77.1429	22.8571
Tmt-0219-14	Cualac formation	90.3148	0	9.68523	100	0	0	60	40	0	0	95	5
Tmt-0219-16	Cualac formation	50.3632	0	49.6368	100	0	0	21.4634	78.5366	0	0	72.1951	27.8049
MIX-1	Lower Tecocoyunca group	92.7318	0	7.26817	82.7586	17.2414	0	62.069	20.6897	17.2414	0	100	0
MIX-2	Lower Tecocoyunca group	86.3415	0.243902	13.4146	67.2727	32.7273	0	29.0909	38.1818	32.7273	0	94.5946	5.40541
MIX-3	Lower Tecocoyunca group	93.643	0	6.35697	53.8462	46.1538	0	30.7692	23.0769	46.1538	0	100	0
MIX-6	Lower Tecocoyunca group	90.4177	0	9.58231	97.4359	2.5641	0	12.8205	84.6154	2.5641	0	84.2105	15.7895
Tmt-0219-7	Lower Tecocoyunca group	87.8481	0	12.1519	64.5833	35.4167	0	12.5	52.0833	35.4167	0	96.7742	3.22581
Tmt-0219-10	Lower Tecocoyunca group	93.7186	0	6.28141	68	32	0	48	20	32	0	100	0
Tmt-0219-11	Lower Tecocoyunca group	93.3168	0	6.68317	48.1481	51.8519	0	22.2222	25.9259	51.8519	0	92.3077	7.69231
Tmt-0219-12	Lower Tecocoyunca group	95.2261	0	4.77387	84.2105	15.7895	0	47.3684	36.8421	15.7895	0	93.75	6.25
Tmt-0219-13	Lower Tecocoyunca group	89.4207	0	10.5793	59.5238	40.4762	0	23.8095	35.7143	40.4762	0	100	0
Tmt-0219-17	Lower Tecocoyunca group	95.25	0	4.75	42.1053	57.8947	0	15.7895	26.3158	57.8947	0	100	0
Olinalá area
Sample	Unit	QtFL%Q	QtFL%F	QtFL%L	LmLvLs%Lm	LmLvLs%Lv	LmLvLs%Ls	LmfLmpLvf%Lmf	LmfLmpLvf%Lmp	LmfLmpLvf%Lvf	R1R2-3R4%R1	R1R2-3R4%R2-3	R1R2-3R4%R4
CU-02	Cualac formation	91.2736	0	8.72642	100	0	0	40.5405	59.4595	0	0	94.5946	5.40541
CU-03	Cualac formation	92.7885	0	7.21154	100	0	0	70	30	0	0	96.6667	3.33333
CU-05	Cualac formation	89.1765	0	10.8235	100	0	0	45.6522	54.3478	0	0	95.6522	4.34783
CU-06	Cualac formation	94.186	0	5.81395	100	0	0	72	28	0	0	96	4
CU-08	Cualac formation	98.0676	0	1.93237	100	0	0	50	50	0	0	100	0
CT-10	Cualac formation	96.9555	0	3.0445	100	0	0	38.4615	61.5385	0	0	100	0
CT-11	Cualac formation	93.0288	0	6.97115	100	0	0	48.2759	51.7241	0	0	96.5517	3.44828
T-12	Lower Tecocoyunca group	94.5626	0	5.43735	82.6087	17.3913	0	34.7826	47.8261	17.3913	0	100	0
T-13	Lower Tecocoyunca group	85.4067	0	14.5933	26.2295	73.7705	0	11.4754	14.7541	73.7705	0	100	0
OL-0618-T3	Lower Tecocoyunca group	89.8219	6.87023	3.30789	15.3846	84.6154	0	7.69231	7.69231	84.6154	0	100	0
OL-1018-1b	Lower Tecocoyunca group	81.4433	4.38144	14.1753	29.0909	70.9091	0	12.7273	16.3636	70.9091	0	100	0
OL-1018-2	Lower Tecocoyunca group	92.602	4.84694	2.55102	10	90	0	10	0	90	0	100	0
OL-1018-3a	Lower Tecocoyunca group	95.8974	1.79487	2.30769	22.2222	77.7778	0	0	22.2222	77.7778	0	100	0
OL-1018-4	Lower Tecocoyunca group	91.9897	2.06718	5.94315	34.7826	65.2174	0	8.69565	26.087	65.2174	0	100	0
